# Supplementary material
Source: PubMed Central journal article supplement (PMC5877417)
Supplement: NIHMS952337-supplement-1.pdf [file NIHMS952337-supplement-1.pdf]

**Cell Reports, Volume 22**

**Supplemental Information**

**Cbx4 Sumoylates Prdm16**

**to Regulate Adipose Tissue Thermogenesis**

**Qingbo Chen, Lei Huang, Dongning Pan, Lihua J. Zhu, and Yong-Xu Wang**

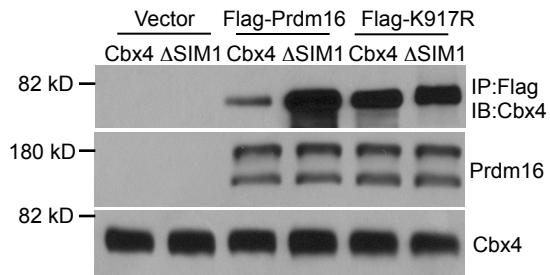

**Figure S1, related to Figure 3. Prdm16 K917R mutant interacts with Cbx4.** HEK293 cells were co-transfected with indicated plasmids. Immunoprecipitation was performed with anti-Flag beads, and presence of Cbx4 in the immunoprecipitate complex was examined with an anti-Cbx4 antibody.

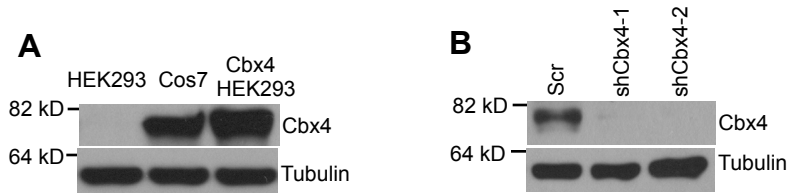

**Figure S2, related to Figure 3.** (A) Expression of endogenous Cbx4 protein in HEK293 cells and Cos7 cells. (B) Cbx4 protein level in Cos7 cells after lentiviral knockdown.

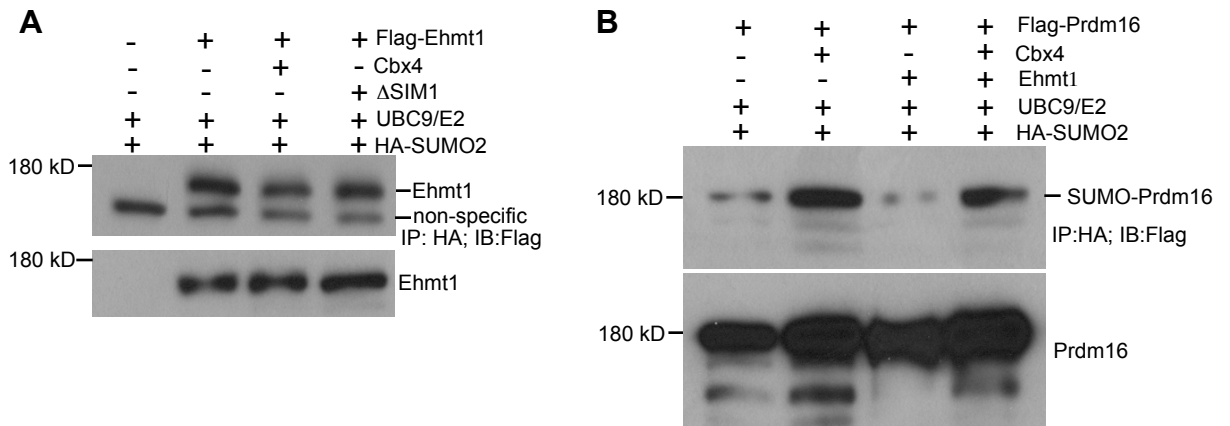

**Figure S3. Related to Figure 3. Cbx4 does not sumoylate Ehmt1 (A) and Ehmt1 does not increase Cbx4 sumoylation activity (B).** HEK293 cells were transfected with indicated plasmids and treated with MG132 for 16 hr before harvesting for immunoprecipitation. (A) Sumoylation of Ehmt1. (B) Sumoylation of Prdm16.

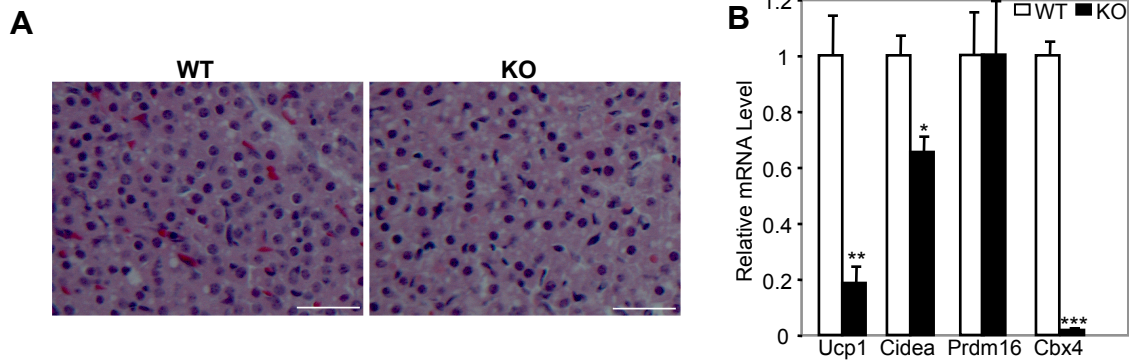

**Figure S4, related to Figure 5.** (A) H&E staining of BAT isolated from neonatal Cbx4 null mice. Shown are representative images of three mice per group. Scale bar=200  $\mu$ m. (B) Gene expression in BAT isolated from 18.5 Day embryos of Cbx4 null. Data represent mean  $\pm$  SEM. \* $p$ <0.05, \*\* $p$ <0.01, \*\*\* $p$ <0.001.

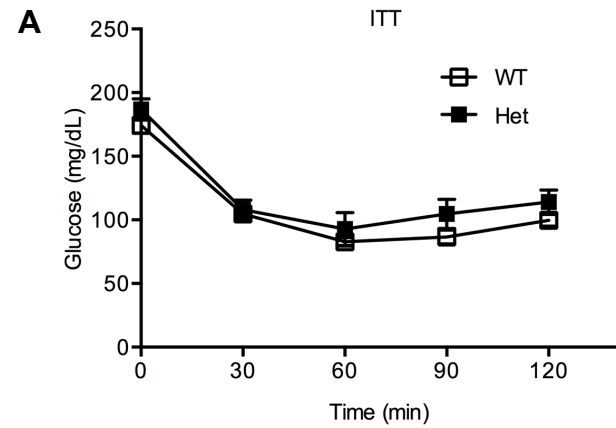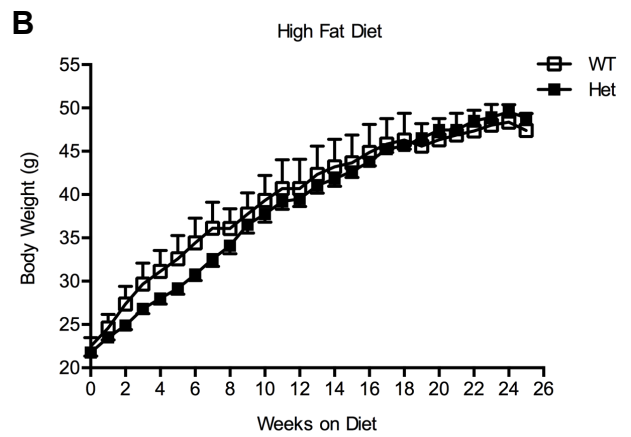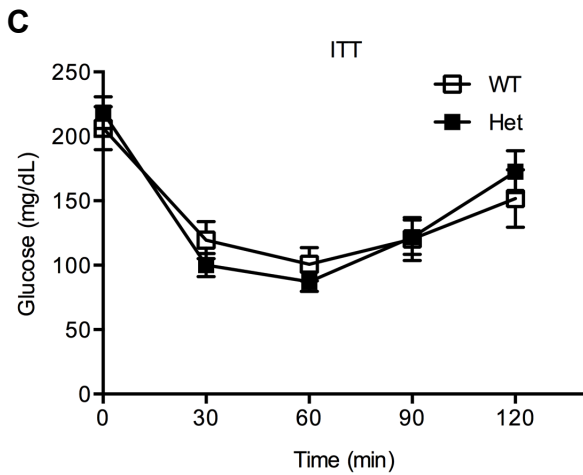

**Figure S5, related to Figure 6.** (A) Insulin tolerance test of 10-month-old male wild type and Cbx4 heterozygous mice ( $n=6-8$  mice/group). (B) Body weights of male wild type and Cbx4 heterozygous mice fed a high fat diet ( $n=6$  mice/group). (C) Insulin tolerance test of male wild type and Cbx4 heterozygous mice fed a high fat diet for 25 weeks ( $n=5-7$  mice/group). Data represent mean  $\pm$  SEM.

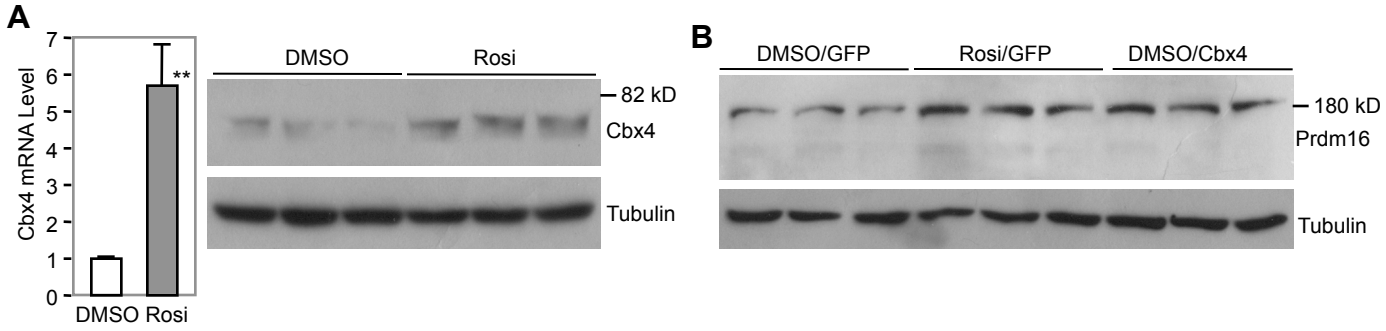

**Figure S6, related to Figure 4.** (A) Primary iWAT adipocytes were treated with Rosiglitazone (1  $\mu$ M) during differentiation, and Cbx4 mRNA (n=4) and protein were measured. Data represent mean  $\pm$  SEM. \*\*p<0.01.

(B) Adipocytes were treated with Rosiglitazone or were infected with Cbx4 adenovirus, and Prdm16 protein was measured.
